# Supplementary material
Source: MDPI journal article supplement (https://www.mdpi.com/1999-4907/15/5/873)
Supplement: s1 [file s1 › Supplementary Tables.xlsx]

## Sheet: Supplementary Tables Catalogs
Supplementary Tables Catalogs
Supplementary Table	Content
Supplementary Table S1	Primer sequences of reference genes
Supplementary Table S2	Reads quality of transcriptome
Supplementary Table S3	GO enrichment of DEGs in xylem
Supplementary Table S4	GO enrichment of DEGs in cambium
Supplementary Table S5	KEGG enrichment of DEGs in cambium
Supplementary Table S6	KEGG enrichment of DEGs in xylem
Supplementary Table S7	DEGs related to plant hormone signal pathway in cambium and xylem
Supplementary Table S8	DEGs related to amino sugar and nucleotide sugar metabolism pathway in cambium and xylem
Supplementary Table S9	DEGs related to the monolignol biosynthesis pathway in cambium and xylem
Supplementary Table S10	Description of DEGs related to cambium activity in cambium
Supplementary Table S11	Annotation of transcription factor genes among DEGs in cambium
Supplementary Table S12	Annotation of transcription factor genes among DEGs in xylem
Supplementary Table S13	DEGs related to programmed cell death in xylem

## Sheet: Supplementary Table S1
Supplementary Table S1. Primer sequences of reference genes
Primer name	Sequence（5' to 3'）
COMT2-F	TCTTGAAGAATTGCTATGACGCCT
COMT2-R	GAATGCACTCAACAAGTATCACCTTG
CCoAOMT1-F	CAGTAATTCAGAAAGCTGGTGTTGC
CCoAOMT1-R	GCATCCACAAAGATGAAATCAAAAC
C3H3-F	TCTACGCTTCAAGCTCCCACCA
C3H3-R	GGAACCTCACAGGCTTGACG
4CL3-F	ACTAGCCCATCCAGAGATAT
4CL3-R	CATCTTCGGTGGCCTGAGAC
CesA4-F	AGTTGAAGTTGCTGGAGAGGC
CesA4-R	GGCTAGGAACCATATGCTAGC
CesA5-F	AATTCCTCTCCTGACATATGGTG
CesA5-R	AGGACATGGAAGAATCCGGAAAT
CesA8-F	ATGCCATAGCTGTGGTGACCAG
CesA8-R	CCCTCCTTGATCTCATACTCG
CesA12-F	AGAGATTTGCATATATCAATACCAC
CesA12-R	GGCGATGTTACTAATCTGTGGA
CesA14-F	CATCAGAGATCACCCAGGAATG
CesA14-R	TCACGGGACACATACACTAGCC
CesA18-F	AGTTTGAAATCAAAGAGGGCCGG
CesA18-R	GAGGTGCGTAACAAGCAAATGG
GUX1a-F	AGAAGTTCTTGTTGCAAGTTTCC
GUX1a-R	TGAAACATATCTAGGATCTGATCC
GUX1b-F	GTTGGATCCTAGATATGTATCAG
GUX1b-R	GAAGAGCAACATGTGTAGCGTC
IRX8-1-F	ACCGCTGACACCATTGATGCAG
IRX8-1-R	GTACTTGATACATCACCTCTGGT
IRX9-1-F	AGTCCTGTGCCAACTCCATTAAG
IRX9-1-R	TTGCCAGTCTTCTTGGTAGTAAC
IRX9-2-F	ATCGCAATCCTTGCCGCAACC
IRX9-2-R	TGGTGGAGCTGGTACTGCAG
IRX9-L-B1-F	TTGGTGTCTCGGAAACTCTTG
IRX9-L-B1-R	AGTCCTCCTCAGGATATCAGC
IRX10-1-F	CTCCCGTTACTCCAGCGTTCTAC
IRX10-1-R	ATGGACCGTGGAATGTCAGGG
IRX10-2-F	CACTCTTTGACATCTCCACCG
IRX10-2-R	AATACCACTGCTTCGACCAGTC
IRX14-2-F	CTTCTCTACCTCCACGACCAC
IRX14-2-R	CAACAACTCTCGAACTCACCG
PARVUS-L-1-F	TTAACACTACCATCACCGCC
PARVUS-L-1-R	TGGTGGAGATTGATGGACATG
CLE44-F	TATCCAAGAAACTCACAGCGG
CLE44-R	TGGTACTGCTTGTCATATCGG
LBD4b-F	TACAGGAACTACCGGTGCATC
LBD4b-R	ATGATATAGCACCCACGCAC
HB4a-F	GAGAACCACATGCGAGACAATG
HB4a-R	TGCCAAAGTAAGAGCCTCAGG
WOX4b-F	TTCCAAAATCACAAAGCCCGC
WOX4b-R	TCCAAGCACTCAAAGGTCCAG
PXYb-F	GGAGATTATAAGCGGCAAGAGG
PXYb-R	GTCATTTACACCGTCCTTAGCC
LBD3a-F	TCCTCCTCCAGTTGTTATTACC
LBD3a-R	TGCTAGCTCCAAAGACCCTATG
LBD3b-F	CCTCCTCCGCCAGTTGTTAGC
LBD3b-R	TGCTGGCTCCAAACACCCTATG
TCP20b-F	CCTCATTGTTCGGCCTACAG
TCP20b-R	TGGAGGTCTTGGCTTTCTTG
HB4b-F	CCAAAGCCTAGTTCCTTGAGAA
HB4b-R	AGACGAGAAGATTCCTTTCTC
VCM1-F	TGTCTGGACCAAATGATCACTC
VCM1-R	CTCCTGCCTTTAATTGTCGTTC
TCP20a-F	GCCTATCCCTCCATTCTTTCC
TCP20a-R	CATTTGTGTCGTTGCTCCAAG
WOX4a-F	AGCTTCATCAGACCCGATAGC
WOX4a-R	ATCCCTATCTGCTCTTGTGTCG
DA1-F	CTTATTGAATATAGGGCAAGTCC
DA1-R	GTATCCATGATTGCTGAGTCCAG
HCA2-F	AGATATGAGCCATCATCACGG
HCA2-R	TGATCATGATCATTTCCCTGGTC
VCM2-F	GGAACAAATGACCAACGCTC
VCM2-R	AACTGTCGCTCCAGTTGCTTC
CLE47-F	GTGATTTGGTTCTTGTATGTTG
CLE47-R	TCTTCCAGATAGCTTCAGATGC
Actin-F	TGTTGCCCTTGACTATGAGCAGGA
Actin-R	ACGGAATCTCTCAGCTCCAATGGT

## Sheet:  Supplementary Table S2
Supplementary Table S2. Reads quality of transcriptome
Sample	Total Raw Reads (M)	Total Clean Reads (M)	Total Clean Bases(Gb)	Clean Reads Q20(%)	Clean Reads Q30(%)	Clean Reads Ratio(%)	Total Mapping(%)
WX_1	27.47	23.08	3.46	98.06	94.31	84.02	88.88
WX_2	27.88	23.63	3.55	98.08	94.4	84.77	90.4
WX_3	30.01	24.99	3.75	98.03	94.27	83.27	87.08
DX_1	26.11	22.59	3.39	98.12	94.54	86.5	89.58
DX_2	26.85	23.5	3.52	98.19	94.72	87.52	90.42
DX_3	28.54	24.65	3.7	98.12	94.56	86.37	89.79
WC_1	28.41	24.5	3.67	98.11	94.51	86.21	89.33
WC_2	29.1	25.29	3.79	98.14	94.6	86.9	89.89
WC_3	32.71	28.14	4.22	98.12	94.53	86.03	88.44
DC_1	26.2	22.13	3.32	98.05	94.28	84.47	90.34
DC_2	38.27	32.28	4.84	98.06	94.33	84.34	90.41
DC_3	29.05	24.47	3.67	98.03	94.28	84.23	90.59

## Sheet:  Supplementary Table S3
Supplementary Table S3. GO enrichment of DEGs in xylem
GO term ID	GO term	level 1	level 2	GO term candidate gene number	GO rich ratio	P value	Q value
GO:0003700	DNA binding transcription factor activity	molecular_function	transcription regulator activity	404	0.334714	9.24673e-17	4.17952e-13
GO:0008017	microtubule binding	molecular_function	binding	91	0.484043	3.9746e-14	8.55935e-11
GO:0015630	microtubule cytoskeleton	cellular_component	cell	96	0.461538	5.68098e-14	8.55935e-11
GO:0044430	cytoskeletal part	cellular_component	organelle part	109	0.436	1.32861e-13	1.50132e-10
GO:0005856	cytoskeleton	cellular_component	cell	116	0.417266	8.38263e-13	6.62584e-10
GO:0140110	transcription regulator activity	molecular_function	transcription regulator activity	433	0.313541	8.79537e-13	6.62584e-10
GO:0005874	microtubule	cellular_component	organelle part	64	0.516129	1.85911e-12	1.20046e-09
GO:0005871	kinesin complex	cellular_component	organelle part	56	0.543689	2.81741e-12	1.59183e-09
GO:0099080	supramolecular complex	cellular_component	supramolecular complex	67	0.496296	5.92694e-12	2.23248e-09
GO:0099081	supramolecular polymer	cellular_component	supramolecular complex	67	0.496296	5.92694e-12	2.23248e-09
GO:0099512	supramolecular fiber	cellular_component	supramolecular complex	67	0.496296	5.92694e-12	2.23248e-09
GO:0099513	polymeric cytoskeletal fiber	cellular_component	organelle part	67	0.496296	5.92694e-12	2.23248e-09
GO:0005975	carbohydrate metabolic process	biological_process	metabolic process	369	0.314043	7.37751e-12	2.5651e-09
GO:0015631	tubulin binding	molecular_function	binding	92	0.446602	9.75876e-12	3.15069e-09
GO:0003777	microtubule motor activity	molecular_function	catalytic activity	58	0.527273	2.00882e-11	6.05324e-09
GO:0016682	oxidoreductase activity, acting on diphenols and related substances as donors, oxygen as acceptor	molecular_function	catalytic activity	53	0.546392	2.44351e-11	6.90291e-09
GO:0071944	cell periphery	cellular_component	cell	825	0.27336	5.91377e-11	1.57237e-08
GO:0005886	plasma membrane	cellular_component	cell	712	0.277799	7.2898e-11	1.83055e-08
GO:0003774	motor activity	molecular_function	catalytic activity	62	0.496	1.20499e-10	2.86661e-08
GO:0005875	microtubule associated complex	cellular_component	organelle part	63	0.480916	1.36992e-10	3.09602e-08

## Sheet: Supplementary Table S4
Supplementary Table S4. GO enrichment of DEGs in cambium
GO term ID	GO term	level 1	level 2	GO term candidate gene number	GO rich ratio	P value	Q value
GO:0043228	non-membrane-bounded organelle	cellular_component	organelle	692	0.409225	1.11892e-17	2.86276e-14
GO:0043232	intracellular non-membrane-bounded organelle	cellular_component	cell	692	0.409225	1.11892e-17	2.86276e-14
GO:0015630	microtubule cytoskeleton	cellular_component	cell	121	0.581731	1.50139e-15	2.56088e-12
GO:0005874	microtubule	cellular_component	organelle part	80	0.645161	3.78264e-14	4.74253e-11
GO:0009451	RNA modification	biological_process	cellular process	351	0.447704	4.63409e-14	4.74253e-11
GO:0099080	supramolecular complex	cellular_component	supramolecular complex	83	0.614815	6.43636e-13	3.65943e-10
GO:0099081	supramolecular polymer	cellular_component	supramolecular complex	83	0.614815	6.43636e-13	3.65943e-10
GO:0099512	supramolecular fiber	cellular_component	supramolecular complex	83	0.614815	6.43636e-13	3.65943e-10
GO:0099513	polymeric cytoskeletal fiber	cellular_component	organelle part	83	0.614815	6.43636e-13	3.65943e-10
GO:0007017	microtubule-based process	biological_process	cellular process	120	0.550459	2.40856e-12	1.23246e-09
GO:0044430	cytoskeletal part	cellular_component	organelle part	131	0.524	4.58039e-12	2.13071e-09
GO:0007018	microtubule-based movement	biological_process	cellular process	77	0.620968	7.37966e-12	3.14681e-09
GO:0004519	endonuclease activity	molecular_function	catalytic activity	316	0.430518	1.25074e-11	4.92312e-09
GO:0005875	microtubule associated complex	cellular_component	organelle part	78	0.59542	3.13534e-11	1.14597e-08
GO:0003777	microtubule motor activity	molecular_function	catalytic activity	68	0.618182	4.93122e-11	1.6822e-08
GO:0005871	kinesin complex	cellular_component	organelle part	64	0.621359	1.4348e-10	4.58867e-08
GO:0005856	cytoskeleton	cellular_component	cell	136	0.489209	8.7159e-10	2.51813e-07
GO:0006928	movement of cell or subcellular component	biological_process	cellular process	77	0.578947	8.858e-10	2.51813e-07
GO:0003774	motor activity	molecular_function	catalytic activity	72	0.576	1.29525e-09	3.48832e-07
GO:0004518	nuclease activity	molecular_function	catalytic activity	347	0.410165	1.38726e-09	3.5493e-07

## Sheet: Supplementary Table S5
Supplementary Table S5. KEGG enrichment of DEGs in cambium
KEGG term ID	KEGG term	level 1	level 2	KEGG term candidate gene number	KEGG rich ratio	P value	Q value
ko03010	Ribosome	Genetic Information Processing	Translation	296	0.410541	1.92826e-08	2.68027e-06
ko04075	Plant hormone signal transduction	Environmental Information Processing	Signal transduction	396	0.38484	5.35103e-07	3.71897e-05
ko00196	Photosynthesis - antenna proteins	Metabolism	Energy metabolism	23	0.741935	1.26606e-06	5.86607e-05
ko04016	MAPK signaling pathway - plant	Environmental Information Processing	Signal transduction	398	0.375118	9.5927e-06	0.000333346
ko00780	Biotin metabolism	Metabolism	Metabolism of cofactors and vitamins	24	0.55814	0.000814357	0.0226391
ko00230	Purine metabolism	Metabolism	Nucleotide metabolism	202	0.37757	0.00102986	0.0238585
ko00052	Galactose metabolism	Metabolism	Carbohydrate metabolism	125	0.389408	0.00258617	0.0513538
ko00531	Glycosaminoglycan degradation	Metabolism	Glycan biosynthesis and metabolism	43	0.447917	0.00417735	0.0725815
ko00100	Steroid biosynthesis	Metabolism	Lipid metabolism	33	0.464789	0.00572384	0.0795614
ko04712	Circadian rhythm - plant	Organismal Systems	Environmental adaptation	123	0.383178	0.00521781	0.0795614
ko00260	Glycine, serine and threonine metabolism	Metabolism	Amino acid metabolism	71	0.403409	0.00783012	0.0989442
ko00240	Pyrimidine metabolism	Metabolism	Nucleotide metabolism	176	0.365145	0.00978243	0.110681
ko00604	Glycosphingolipid biosynthesis - ganglio series	Metabolism	Glycan biosynthesis and metabolism	34	0.447368	0.0103514	0.110681
ko00350	Tyrosine metabolism	Metabolism	Amino acid metabolism	59	0.406897	0.0117511	0.116672
ko00860	Porphyrin and chlorophyll metabolism	Metabolism	Metabolism of cofactors and vitamins	50	0.413223	0.0139708	0.129463
ko00030	Pentose phosphate pathway	Metabolism	Carbohydrate metabolism	74	0.391534	0.0150198	0.130485
ko00130	Ubiquinone and other terpenoid-quinone biosynthesis	Metabolism	Metabolism of cofactors and vitamins	53	0.40458	0.0183471	0.150014
ko03008	Ribosome biogenesis in eukaryotes	Genetic Information Processing	Translation	114	0.365385	0.031584	0.243899
ko00600	Sphingolipid metabolism	Metabolism	Lipid metabolism	61	0.386076	0.0339265	0.248199
ko00051	Fructose and mannose metabolism	Metabolism	Carbohydrate metabolism	70	0.378378	0.0384094	0.266945

## Sheet:  Supplementary Table S6
Supplementary Table S6. KEGG enrichment of DEGs in xylem
KEGG term ID	KEGG term	level 1	level 2	KEGG term candidate gene number	KEGG rich ratio	P value	Q value
ko04016	MAPK signaling pathway-plant	Environmental Information Processing	Signal transduction	363	0.34213	1.10072e-15	1.51899e-13
ko04075	Plant hormone signal transduction	Environmental Information Processing	Signal transduction	326	0.316812	1.34665e-09	9.29188e-08
ko00196	Photosynthesis-antenna proteins	Metabolism	Energy metabolism	21	0.677419	2.60308e-07	1.19742e-05
ko00520	Amino sugar and nucleotide sugar metabolism	Metabolism	Carbohydrate metabolism	126	0.319797	0.000106435	0.00367201
ko04626	Plant-pathogen interaction	Organismal Systems	Environmental adaptation	376	0.278312	0.000171478	0.00473278
ko00592	alpha-Linolenic acid metabolism	Metabolism	Lipid metabolism	46	0.345865	0.0030648	0.0528679
ko00860	Porphyrin and chlorophyll metabolism	Metabolism	Metabolism of cofactors and vitamins	43	0.355372	0.00230341	0.0528679
ko00591	Linoleic acid metabolism	Metabolism	Lipid metabolism	40	0.347826	0.0049206	0.0754492
ko00350	Tyrosine metabolism	Metabolism	Amino acid metabolism	48	0.331034	0.00660427	0.0911389
ko00430	Taurine and hypotaurine metabolism	Metabolism	Metabolism of other amino acids	11	0.478261	0.0100369	0.125917
ko00943	Isoflavonoid biosynthesis	Metabolism	Biosynthesis of other secondary metabolites	41	0.330645	0.0116489	0.127395
ko00950	Isoquinoline alkaloid biosynthesis	Metabolism	Biosynthesis of other secondary metabolites	31	0.348315	0.012001	0.127395
ko03008	Ribosome biogenesis in eukaryotes	Genetic Information Processing	Translation	90	0.288462	0.0212608	0.20957
ko00260	Glycine, serine and threonine metabolism	Metabolism	Amino acid metabolism	53	0.301136	0.0310742	0.285883
ko00660	C5-Branched dibasic acid metabolism	Metabolism	Carbohydrate metabolism	11	0.407407	0.0376284	0.305454
ko00910	Nitrogen metabolism	Metabolism	Energy metabolism	27	0.329268	0.0375035	0.305454
ko00906	Carotenoid biosynthesis	Metabolism	Metabolism of terpenoids and polyketides	49	0.29878	0.0420832	0.322638
ko00942	Anthocyanin biosynthesis	Metabolism	Biosynthesis of other secondary metabolites	14	0.368421	0.0487971	0.32852
ko02010	ABC transporters	Environmental Information Processing	Membrane transport	81	0.28125	0.0480788	0.32852
ko04070	Phosphatidylinositol signaling system	Environmental Information Processing	Signal transduction	70	0.284553	0.0499921	0.32852

## Sheet: Supplementary Table S7
Supplementary Table S7. DEGs related to plant hormone signal pathway in cambium and xylem
Symbol	KEGG ORTHOLOGY	Gene ID	FPKM in WX	FPKM in DX	FPKM in WC	FPKM in DC
ABF	K14432	Potri.014G028200	15.1567	56.32	15.54	156.327
ABF	K14432	Potri.009G101200	20.5367	74.6133	14.6433	107.05
ABF	K14432	Potri.002G125400	14.1033	50.45	15.19	100.427
ARF	K14486	Potri.012G106100	59.3433	131.28	43.6367	144.597
ARF	K14486	Potri.015G105300	33.1367	71.9733	25.4233	106.967
ARF	K14486	Potri.005G236700	9.63	52.43	14.84	80.57
ARF	K14486	Potri.016G090300	1.07	4.63	0.646667	5.61
ARF	K14486	Potri.002G172800	1.53	3.77	1.91333	4.30667
AUX/IAA	K14484	Potri.010G078400	4.63	40.4833	31.3367	224.997
AUX/IAA	K14484	Potri.018G127800	13.8667	57.26	2.63333	156.647
AUX/IAA	K14484	Potri.008G161100	14.3167	47.5233	15.5433	41.24
BAK1	K13416	Potri.009G090700	57.4533	195.507	25.7433	56.9267
B-ARR	K14491	Potri.007G039400	7.56333	23.82	9.98667	46.72
BRI1	K13415	Potri.003G169400	2.59	8.54333	3.08667	11.9067
BRI1	K13415	Potri.015G061600	0.256667	5.29333	0.01	0.813333
BZR1/2	K14503	Potri.014G041600	13.9467	50.9133	20.7667	145.47
BZR1/2	K14503	Potri.007G030700	14.48	67.61	13.0433	27.93
CRE1	K14489	Potri.003G171000	8.64333	27.2133	5.67333	23.1733
DELLA	K14494	Potri.009G048700	3.17	19.2133	2.02333	30.8967
DELLA	K14494	Potri.001G409500	2.71	10.2933	3.33	21.8467
DELLA	K14494	Potri.001G241800	6.91667	88.1767	13.9067	36.7667
DELLA	K14494	Potri.001G415200	2.59333	8.54333	3.52667	21.4633
DELLA	K14494	Potri.001G023500	1.43	19.82	1.64667	8.72333
DELLA	K14494	Potri.011G131100	2.07667	25.7467	3.17333	8.75
EBF1/2	K14515	Potri.018G130800	40.93	212.063	56.2567	126.617
EIN3	K14514	Potri.008G011300	41.9467	186.39	70.0233	181.203
EIN3	K14514	Potri.004G197400	114.297	365.873	84.5067	180.81
EIN3	K14514	Potri.009G159200	49.0133	127.307	30.4433	79.54
EIN3	K14514	Potri.001G015900	5.73	16.8233	3.67667	13.15
ERF1/2	K14516	Potri.010G072300	1.24	180.887	0.966667	43.13
ERF1/2	K14516	Potri.002G039100	1.06667	48.9533	4.86333	38.2933
ERF1/2	K14516	Potri.005G223100	0.316667	53.52	0.81	7.98
ERF1/2	K14516	Potri.010G072400	0.07	4.18	0.703333	4.6
ETR	K14509	Potri.002G201500	42.7667	214.13	39.4667	107.963
GH3	K14487	Potri.007G050300	0.143333	6.10667	0.13	13.5967
GID1	K14493	Potri.014G135900	7.25333	313.523	5.49667	210.283
GID1	K14493	Potri.002G213100	0.326667	21.1633	0.18	15.0933
GID1	K14493	Potri.008G180500	1.51	21.5	5.93667	26.81
GID1	K14493	Potri.005G040600	29.88	74.39	18.2533	39.6233
GID2	K14495	Potri.005G208200	9.09333	31.46	4.09667	32.65
JAZ	K13464	Potri.006G139400	20.32	397.49	17.17	340.447
JAZ	K13464	Potri.008G133400	97.18	332.737	74.9367	247.05
JAZ	K13464	Potri.001G062500	0.43	74.75	2.24333	90.5367
JAZ	K13464	Potri.010G108200	48.78	162.483	73.4633	214.117
JAZ	K13464	Potri.003G165000	0.49	114.687	2.02667	72.4633
JAZ	K13464	Potri.003G068900	0.506667	86.5067	5.55667	55.7333
JAZ	K13464	Potri.001G166200	0.606667	125.977	2.06667	53.3667
JAZ	K13464	Potri.011G083900	0.18	84.4167	0.503333	24.5767
MYC2	K13422	Potri.014G099700	11.6233	39.2567	10	36.81
MYC2	K13422	Potri.002G172100	5.82333	29.66	7.45333	35.89
MYC2	K13422	Potri.002G176900	2.23333	35.77	15.1333	32.42
NPR1	K14508	Potri.002G056500	2.6	12.9367	6.28667	13.76
PP2C	K14497	Potri.009G037300	2.12	94.88	7.86667	243.58
PP2C	K14497	Potri.012G002700	2.67	92.06	8.9	271.007
PP2C	K14497	Potri.008G059200	42.0967	102.837	44.3333	245.35
PP2C	K14497	Potri.015G018800	0.236667	44.2567	0.0966667	156.207
PP2C	K14497	Potri.012G131800	8.11667	55.82	20.3467	91.4133
PP2C	K14497	Potri.006G164600	2.38333	11.5633	2.37667	36.9267
PP2C	K14497	Potri.015G133900	0.0933333	8.31333	0.0866667	45.8733
PP2C	K14497	Potri.001G245200	2.73	13.2133	10.2467	49.6333
PP2C	K14497	Potri.T063000	2.79333	11.76	2.70333	31.97
PP2C	K14497	Potri.001G092100	0.05	3.06333	0.13	13.0933
PR-1	K13449	Potri.001G288600	3.54333	29.1233	4.27	61.5667
PYR/PYL	K14496	Potri.014G097100	38.7267	128.38	41.0267	210.297
PYR/PYL	K14496	Potri.002G169400	17.4233	37.3767	14.61	71.56
PYR/PYL	K14496	Potri.015G020500	8.22	34.8667	10.8367	56.25
SAUR	K14488	Potri.002G176400	8.94	47.33	20.2433	76.82
SAUR	K14488	Potri.014G066900	6.67333	29.1767	11.2467	52.16
SAUR	K14488	Potri.003G167400	16.7067	105.387	14.8067	36.6467
SAUR	K14488	Potri.015G006800	59.9167	19.33	2.46	8.13667
SAUR	K14488	Potri.003G113100	1.49667	7.65	0.9	3.76333
SIMKK	K13413	Potri.001G281000	0.343333	1.64667	1.39667	6.13667
SnRK2	K14498	Potri.002G099700	6.65667	36.1867	11.3433	78.5433
TCH4	K14504	Potri.018G094900	1.02333	25.5033	0.606667	2.28
TGA	K14431	Potri.002G090700	11.39	38.3633	25.0767	184.75
TGA	K14431	Potri.006G039000	18.17	49.8767	16.7567	43.84
TGA	K14431	Potri.016G036500	18.09	39.9833	18.8067	40.4567

## Sheet:  Supplementary Table S8
Supplementary Table S8. DEGs related to amino sugar and nucleotide sugar metabolism pathway in cambium and xylem
Gene_id	kegg_k_id	kegg_k_name	WX	DX	WC	DC
Potri.006G029900	K01209	abfA	4.66333	12.6767	4.14	12.0933
Potri.002G200300	K00770	E2.4.2.24	0.196667	0.0566667	2.44333	0.0633333
Potri.014G125100	K00770	E2.4.2.24	0.746667	0.1	10.09	0.27
Potri.012G128200	K08679	GAE	1.93333	0.363333	3.59	0.513333
Potri.002G146500	K08679	GAE	21.88	4.55	23.5867	4.49667
Potri.017G059100	K08679	GAE	33.9967	7.57333	61.0067	1.89
Potri.018G100400	K08679	GAE	57.7367	183.413	61.8533	236.763
Potri.014G068400	K08679	GAE	59.47	11.3567	16.1767	7.92
Potri.006G070500	K18677	GALAK	44.15	7.35333	21.2067	9.63
Potri.001G090700	K01784	galE	20.5767	77.1467	18.65	269.14
Potri.003G123700	K01784	galE	23.7967	62.53	19.6233	99.0033
Potri.014G073800	K13648	GAUT	11.92	4.67	16.32	4.64
Potri.002G246500	K13648	GAUT	57.1033	20.08	68.61	12.9533
Potri.009G050000	K00844	HK	5.63333	18.8433	8.33333	3.96
Potri.001G190400	K00844	HK	10.4333	4.47	8.11	3.32
Potri.005G238600	K00844	HK	35.92	13.5567	35.7	15.6867
Potri.008G097600	K13379	RGP	2.39333	0.476667	16.8067	2.19667
Potri.017G099100	K13379	RGP	7.93333	29.37	91.52	203.073
Potri.003G120000	K12451	UER1	121.87	37.0867	62.5067	13.2167
Potri.004G118600	K00012	UGDH	303.773	49.8333	100.803	32.8167
Potri.002G221100	K12447	USP	2.16667	0.41	6.31667	0.88
Potri.010G172800	K12448	UXE	0.54	2.51	1.17	6.52667
Potri.006G022000	K12448	UXE	1.06333	19.3967	1	5.89667
Potri.010G211300	K12448	UXE	7.54	41.05	19.68	52.0667
Potri.001G459700	K12448	UXE	8.24333	25.9767	12.0767	52.8367
Potri.001G237200	K08678	UXS1	441.5	99.8	211.68	68.45
Potri.010G207200	K08678	UXS1	531.543	58.8733	214.043	72.55
Potri.001G294800	K15920	XYL4	0.563333	5.86333	0.0533333	7.61333
Potri.002G093900	K15920	XYL4	1.76333	0.656667	10.9433	1.11
Potri.001G206800	K15920	XYL4	10.29	0.976667	15.4367	0.206667
Potri.003G022900	K15920	XYL4	15.6433	0.643333	8.03	0.913333
Potri.014G122200	K15920	XYL4	83.0567	3.67	58.8367	3.65333
Potri.002G197200	K15920	XYL4	147.22	11.9467	38.7833	6.03

## Sheet:  Supplementary Table S9
Supplementary Table S9. DEGs related to the monolignol biosynthesis pathway in cambium and xylem
Symbol	KEGG ORTHOLOGY	Gene ID	FPKM in WX	FPKM in DX	FPKM in WC	FPKM in DC
4CL	K01904	Potri.001G036900	760.623	339.257	43.2633	14.8067
4CL	K01904	Potri.003G188500	273.81	175.977	2.27	6.07
CCoAOMT	K00588	Potri.009G099800	2216.64	561.567	304.673	85.13
CCoAOMT	K00588	Potri.001G304800	2927.61	1417.66	141.953	98.33
CCR	K09753	Potri.003G181400	640.26	394.26	141.93	60.16
F5H	K09755	Potri.005G117500	423.37	176.11	10.19	15.87
F6H	K09754	Potri.006G033300	1144.75	404.397	19.0733	10.7
C3H	K09755	Potri.007G016400	1055.58	502.39	158.523	60.2167
CAD	K00083	Potri.009G095800	3092.72	2411.49	230.173	532.427
PAL	K10775	Potri.016G091100	1037.53	1215.67	27.3733	66.48
PAL	K10775	Potri.010G224100	813.69	382.56	26.8467	21.0167
COMT	K13066	Potri.012G006400	2986.48	791.117	212.32	104.557
C4H	K00487	Potri.013G157900	1200.31	253.74	30.6967	16.4733
HCT	K13065	Potri.001G042900	97.55	40.08	25.0667	9.34333

[truncated: 4 more sheets:  Supplementary Table S10,  Supplementary Table S11, Supplementary Table S12,  Supplementary Table S13]
